# Supplementary material for: Unraveling the role of structural water in bilayer V2O5 during Zn2+-intercalation: insights from DFT calculations
Source: Royal Society of Chemistry journal article supplement (doi:10.1039/c8ta12014e), 2019-01-01
Supplement: c8ta12014e1.pdf [file c8ta12014e1.pdf]

## SUPPLEMENTARY INFORMATION

# Unraveling the Role of Structural Water in Bilayer $V_2O_5$ during $Zn^{2+}$ -Intercalation: Insights from DFT Calculations

Tao Wu<sup>a</sup>, Kaiyue Zhu<sup>a</sup>, Changyong Qin<sup>b</sup> and Kevin Huang<sup>\*,b</sup>

<sup>a</sup> Department of Mechanical Engineering, University of South Carolina, Columbia, SC  
29208

<sup>b</sup> Department of Chemistry and Biology, Benedict College, Columbia, SC 29204

\*Corresponding author: [huang46@cec.sc.edu](mailto:huang46@cec.sc.edu)

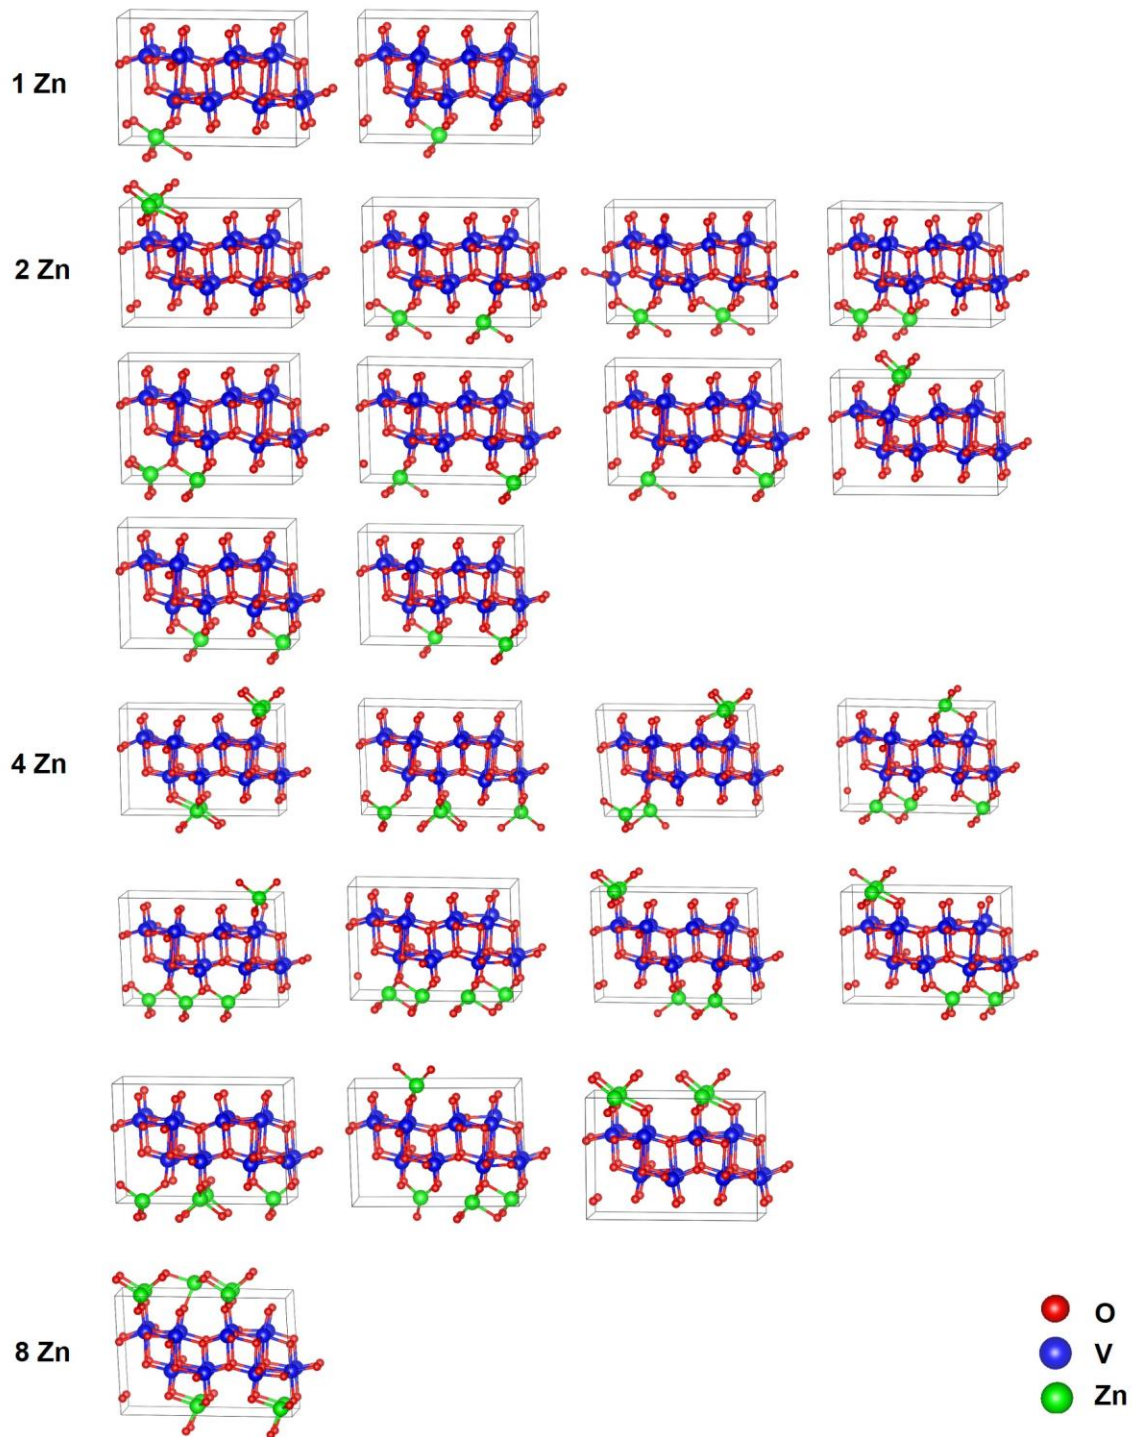

**Fig. S1** The optimized different configurations for bilayer  $V_2O_5$  with different numbers of Zn-ion intercalation.

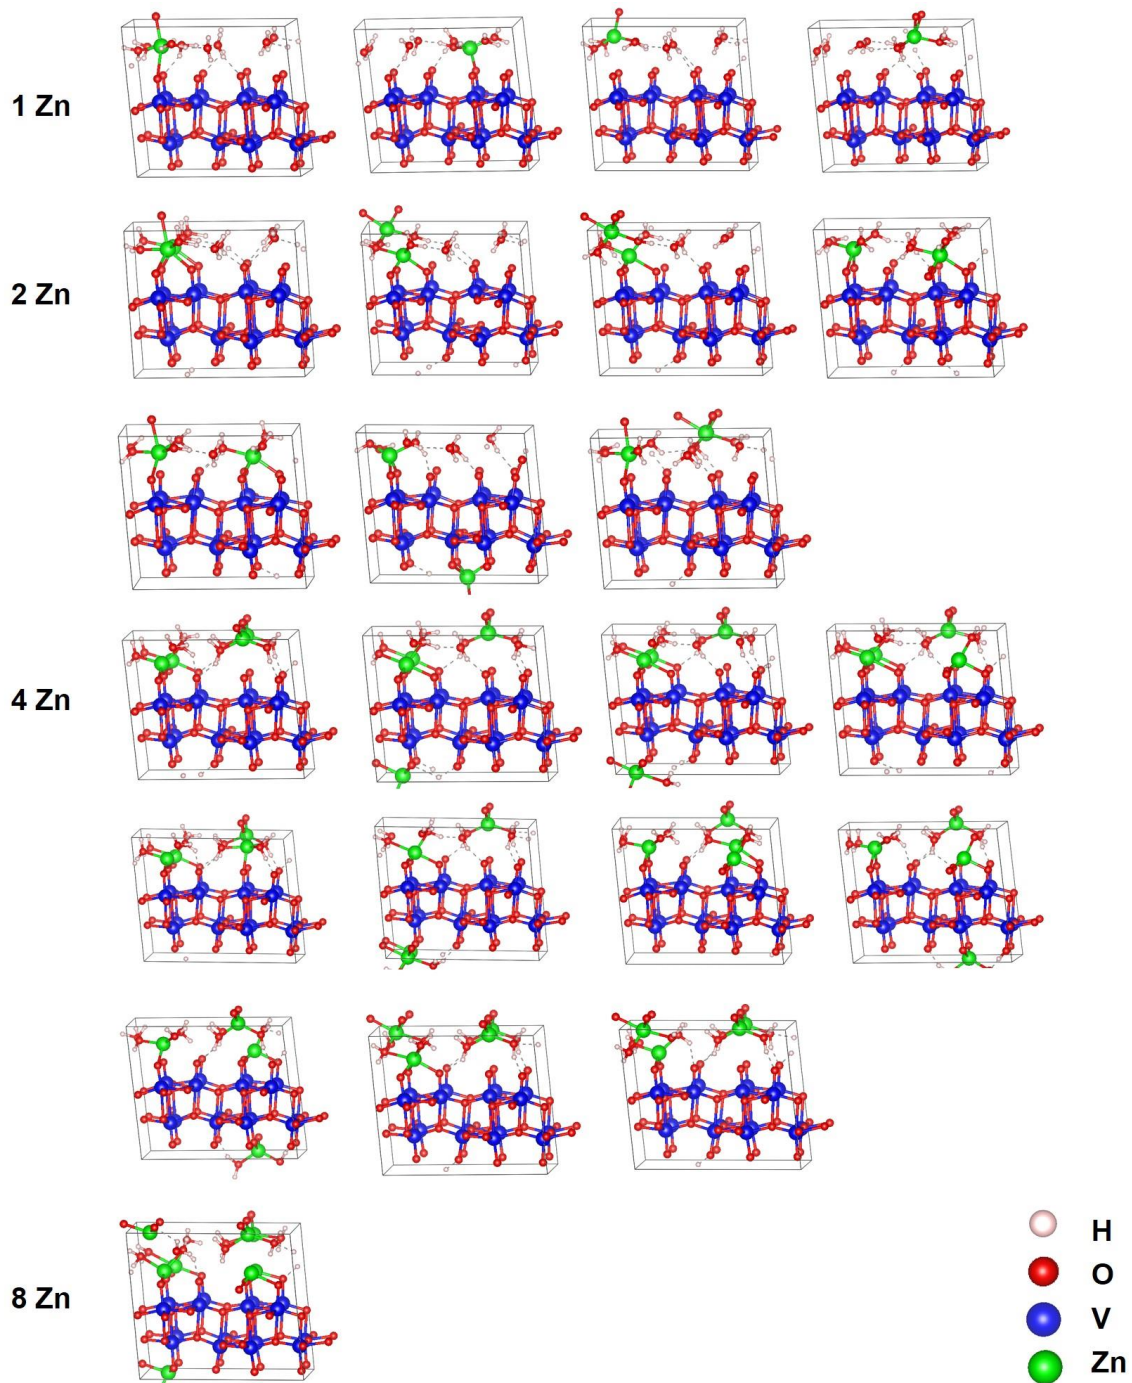

**Fig. S2** The optimized different configurations for  $V_2O_5 \cdot H_2O$  with different numbers of Zn-ion intercalation.

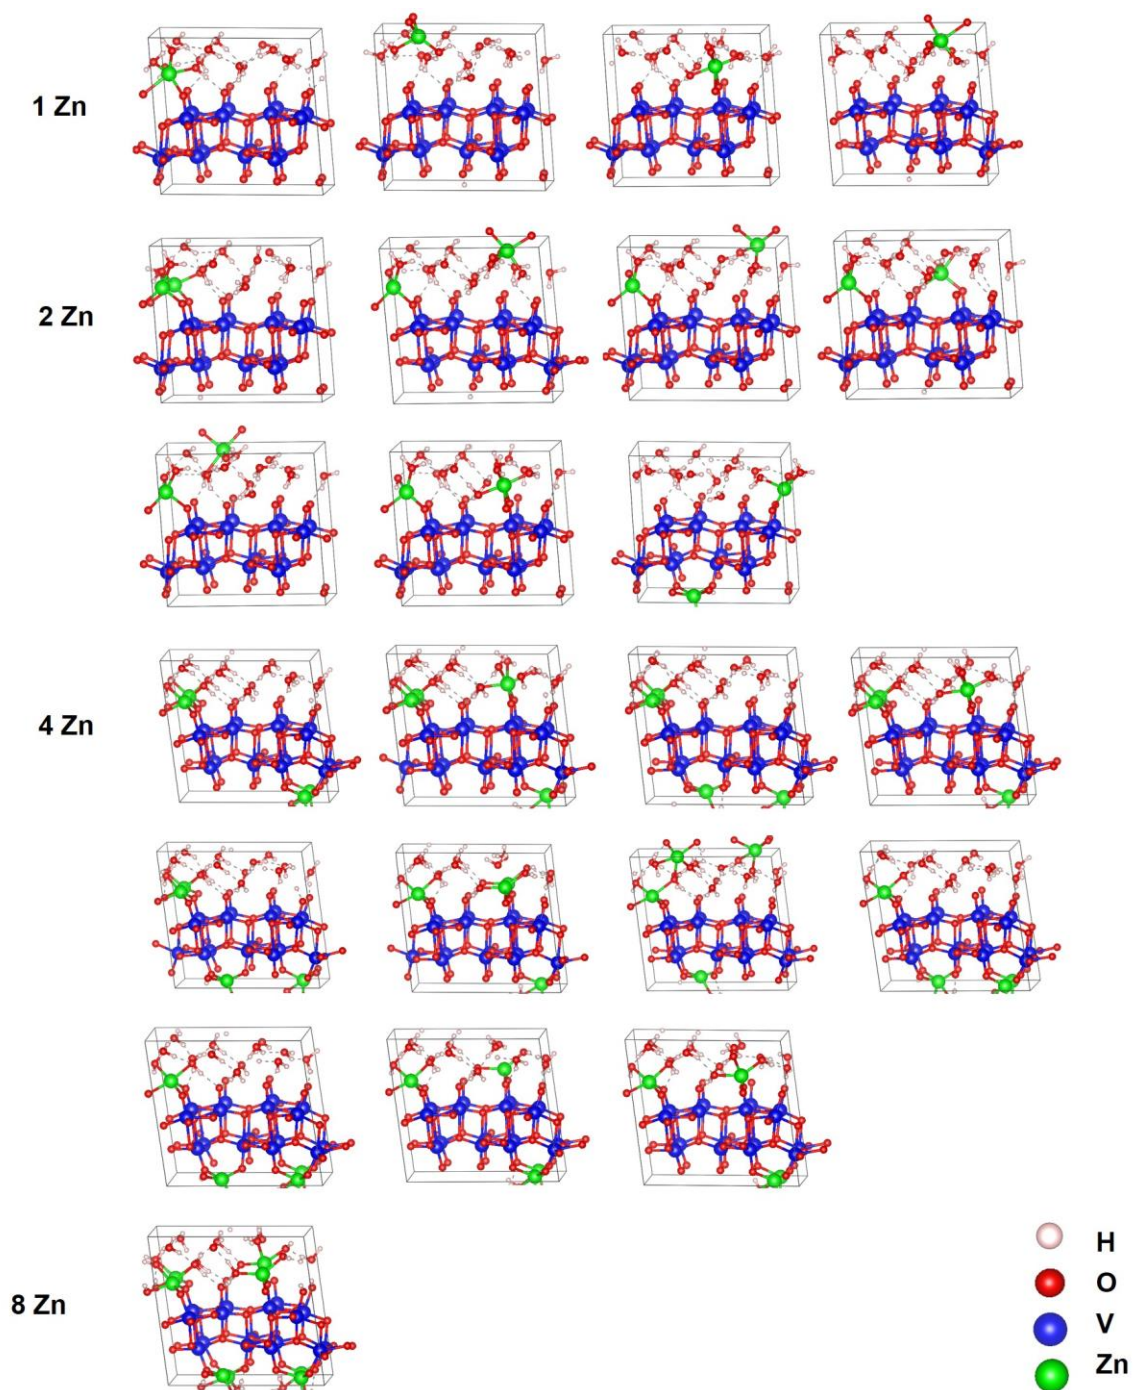

**Fig. S3** The optimized different configurations for  $V_2O_5 \cdot 1.75H_2O$  with different numbers of Zn-ion intercalation.

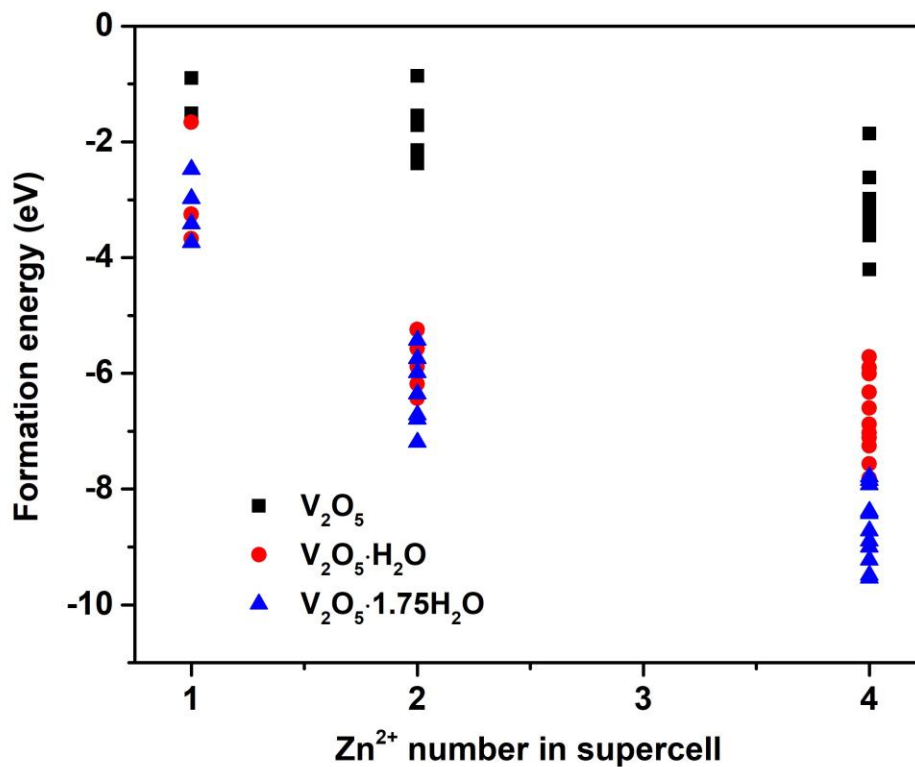

**Fig. S4** The formation energies of Zn for  $V_2O_5$ ,  $V_2O_5 \cdot H_2O$  and  $V_2O_5 \cdot 1.75 H_2O$  with different numbers of Zn intercalation. The formation energies of Zn can be calculated using equation  $\Delta E_f(Zn) = E(Zn_y V_{16} O_{40} \cdot x H_2 O) - E(V_{16} O_{40} \cdot x H_2 O) - y E(Zn)$ .

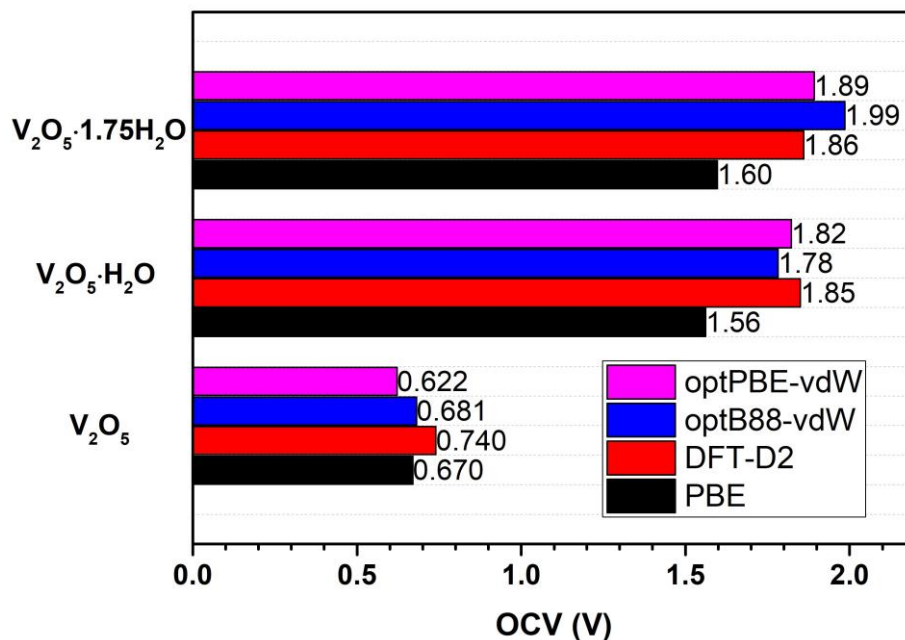

**Fig. S5** The calculated OCV by different functional for  $V_2O_5$ ,  $V_2O_5 \cdot H_2O$  and  $V_2O_5 \cdot 1.75 H_2O$ .

**Table S1** Comparison of calculated lattice parameters of  $V_2O_5 \cdot 1.75H_2O$  by different functionals.

| Method                      | a (Å) | b (Å) | c (Å) |
|-----------------------------|-------|-------|-------|
| PBE                         | 11.82 | 3.66  | 11.84 |
| optB88-vdW                  | 11.68 | 3.64  | 11.13 |
| optPBE-vdW                  | 11.62 | 3.63  | 11.26 |
| DFT-D2                      | 11.63 | 3.61  | 11.35 |
| $V_2O_5 \cdot nH_2O$ (exp.) | 11.72 | 3.57  | 11.52 |
